# Supplementary material
Source: PubMed Central journal article supplement (PMC4821831)
Supplement: NIHMS764192-supplement-2.pdf [file NIHMS764192-supplement-2.pdf]

Figure S1, Related to Figure 2. Comparison of viral taxonomic assignment using blastx and VirusSeeker.

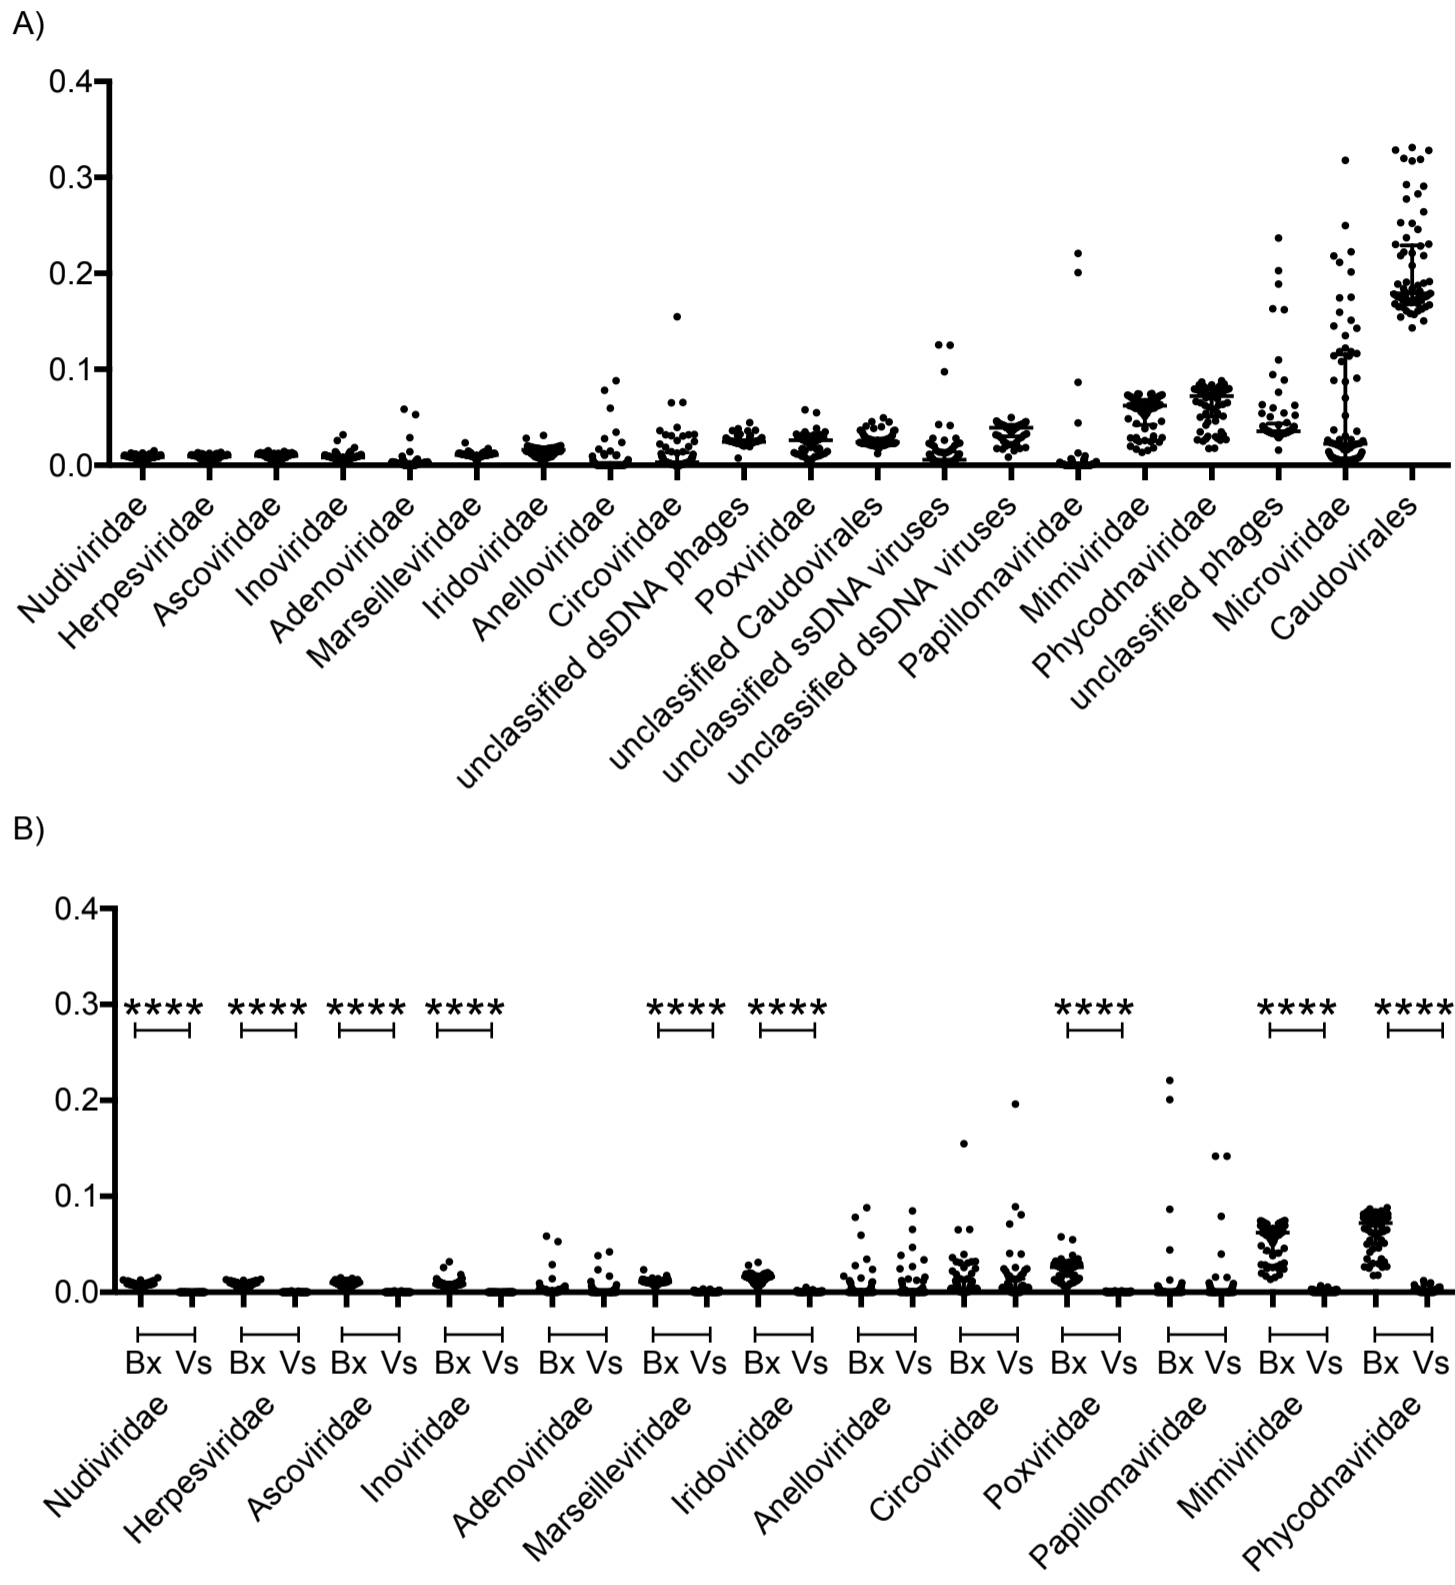

Figure S2, Related to Figure 3. Quantification and comparison of eukaryotic virus sequences detected in fecal samples.

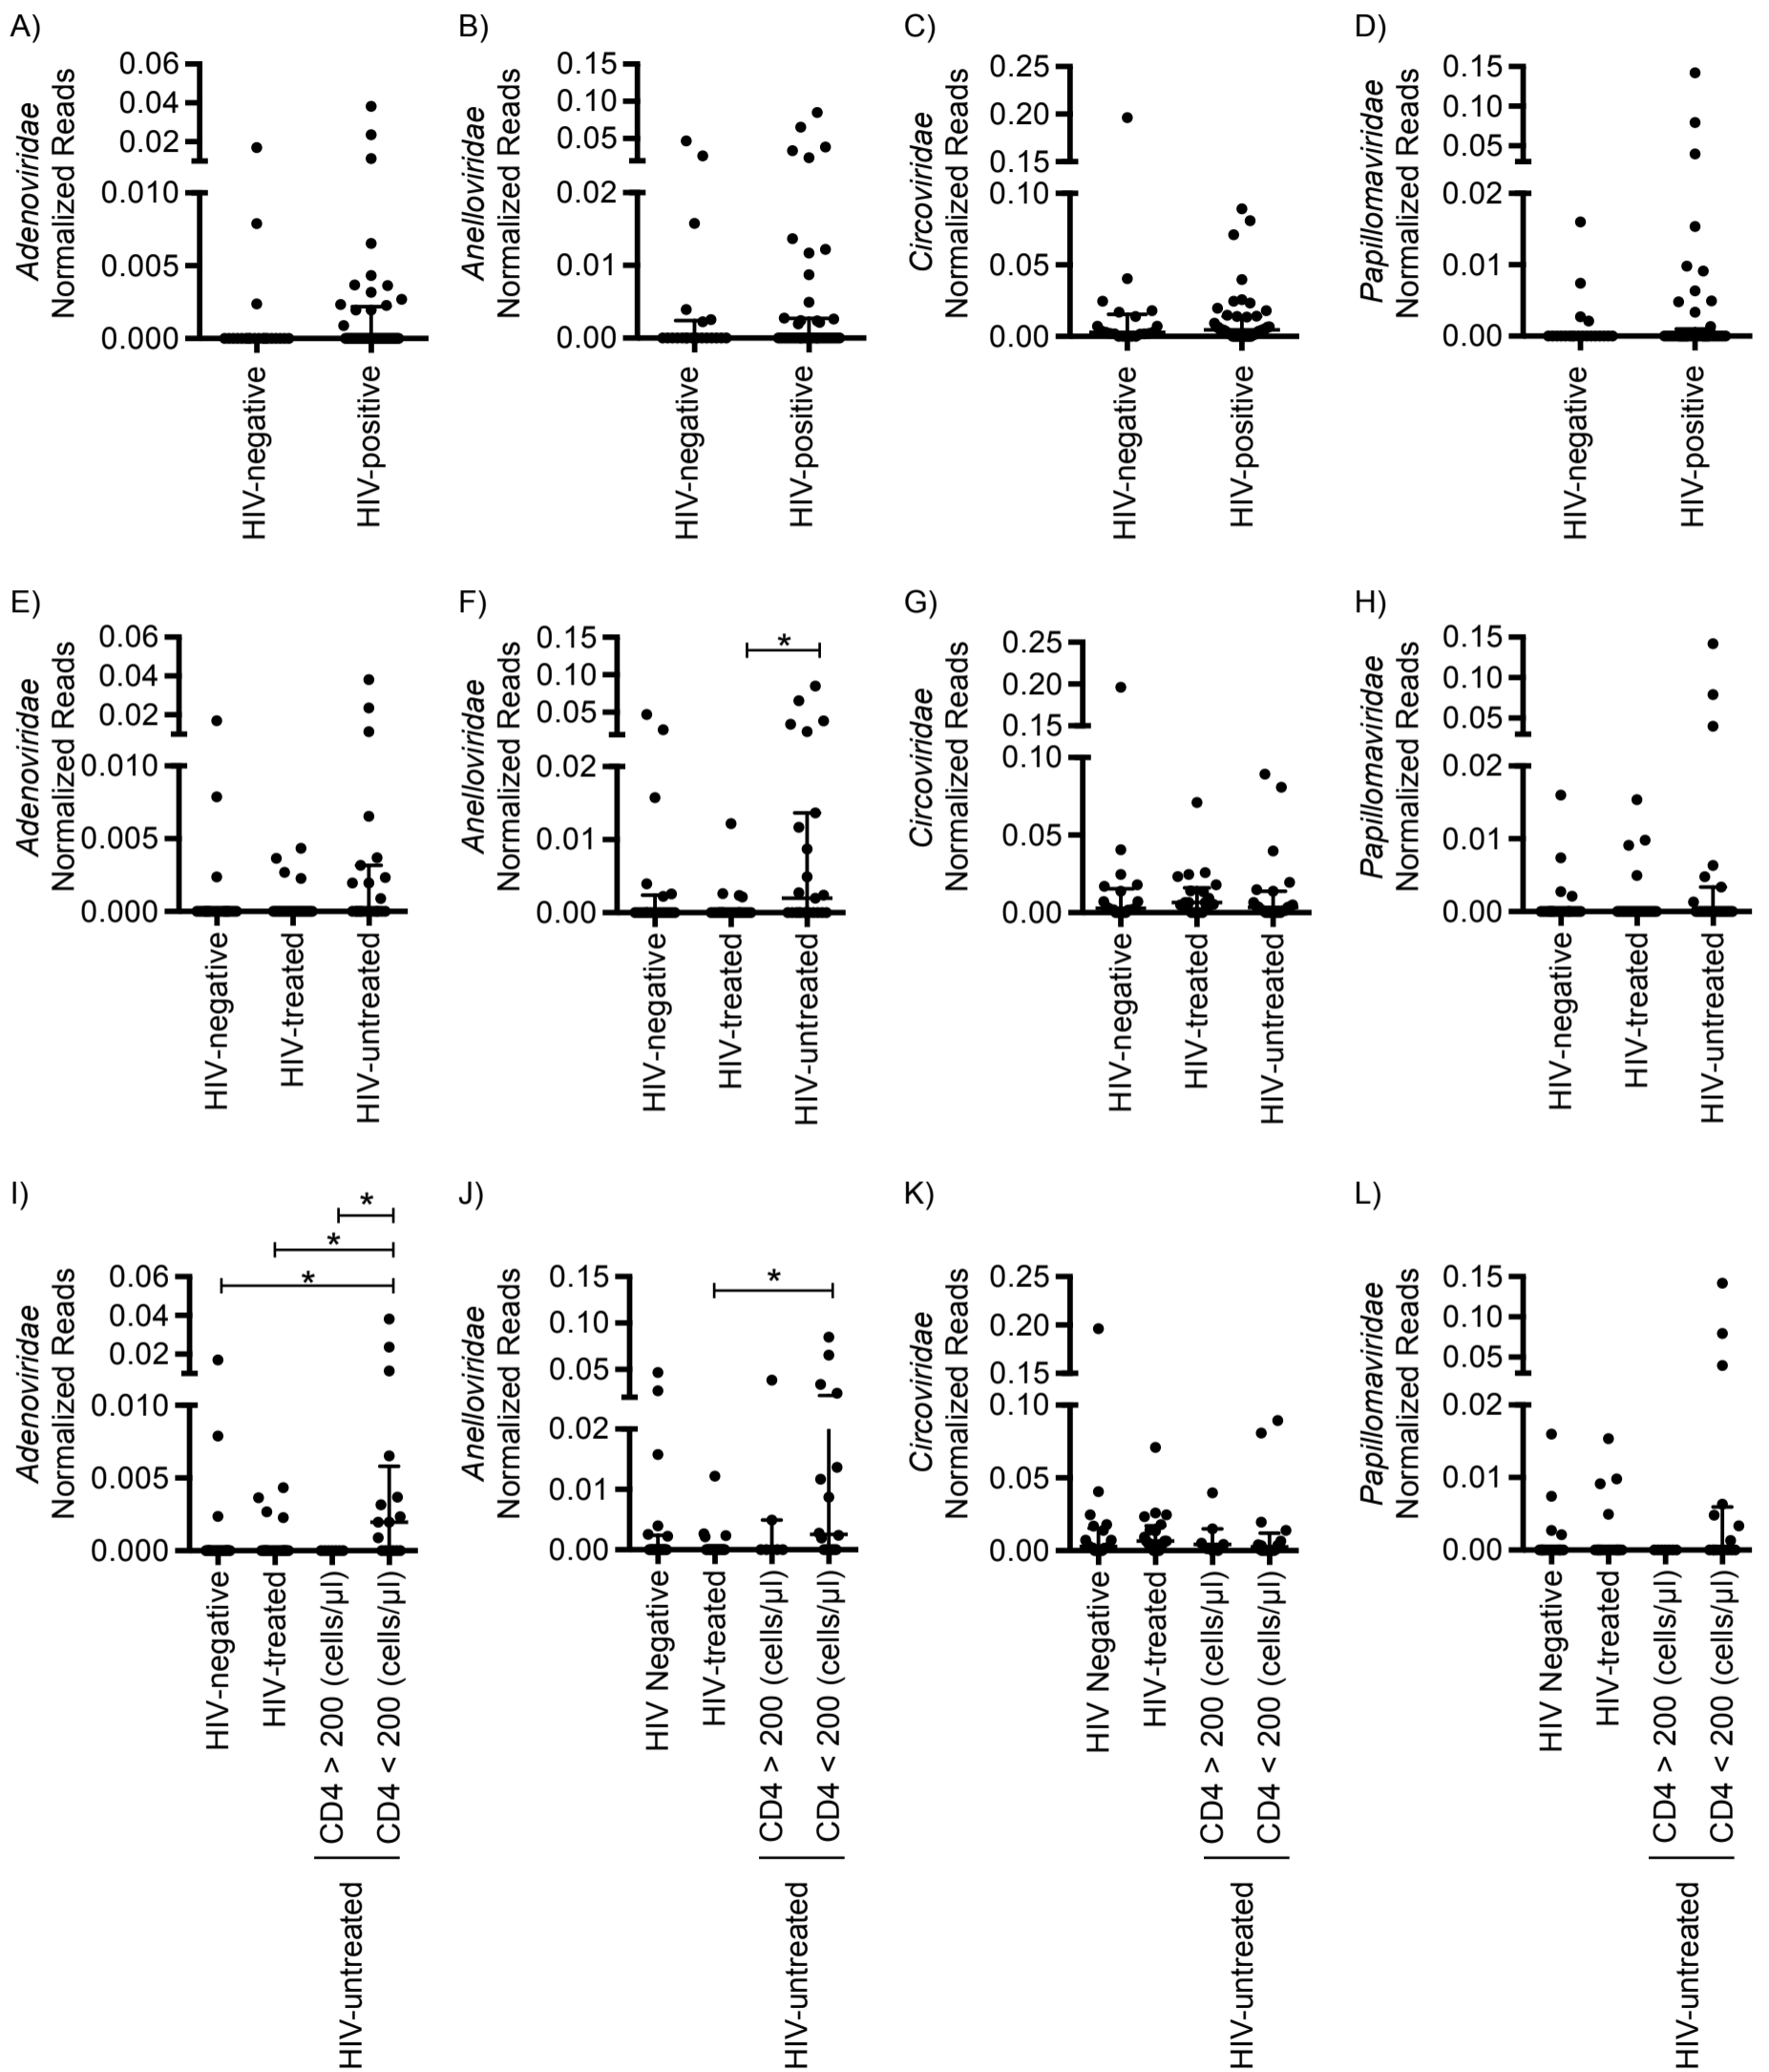

Figure S3, Related to Figure 4. Bacterial class-level taxa barplot by CD4 T cell number.

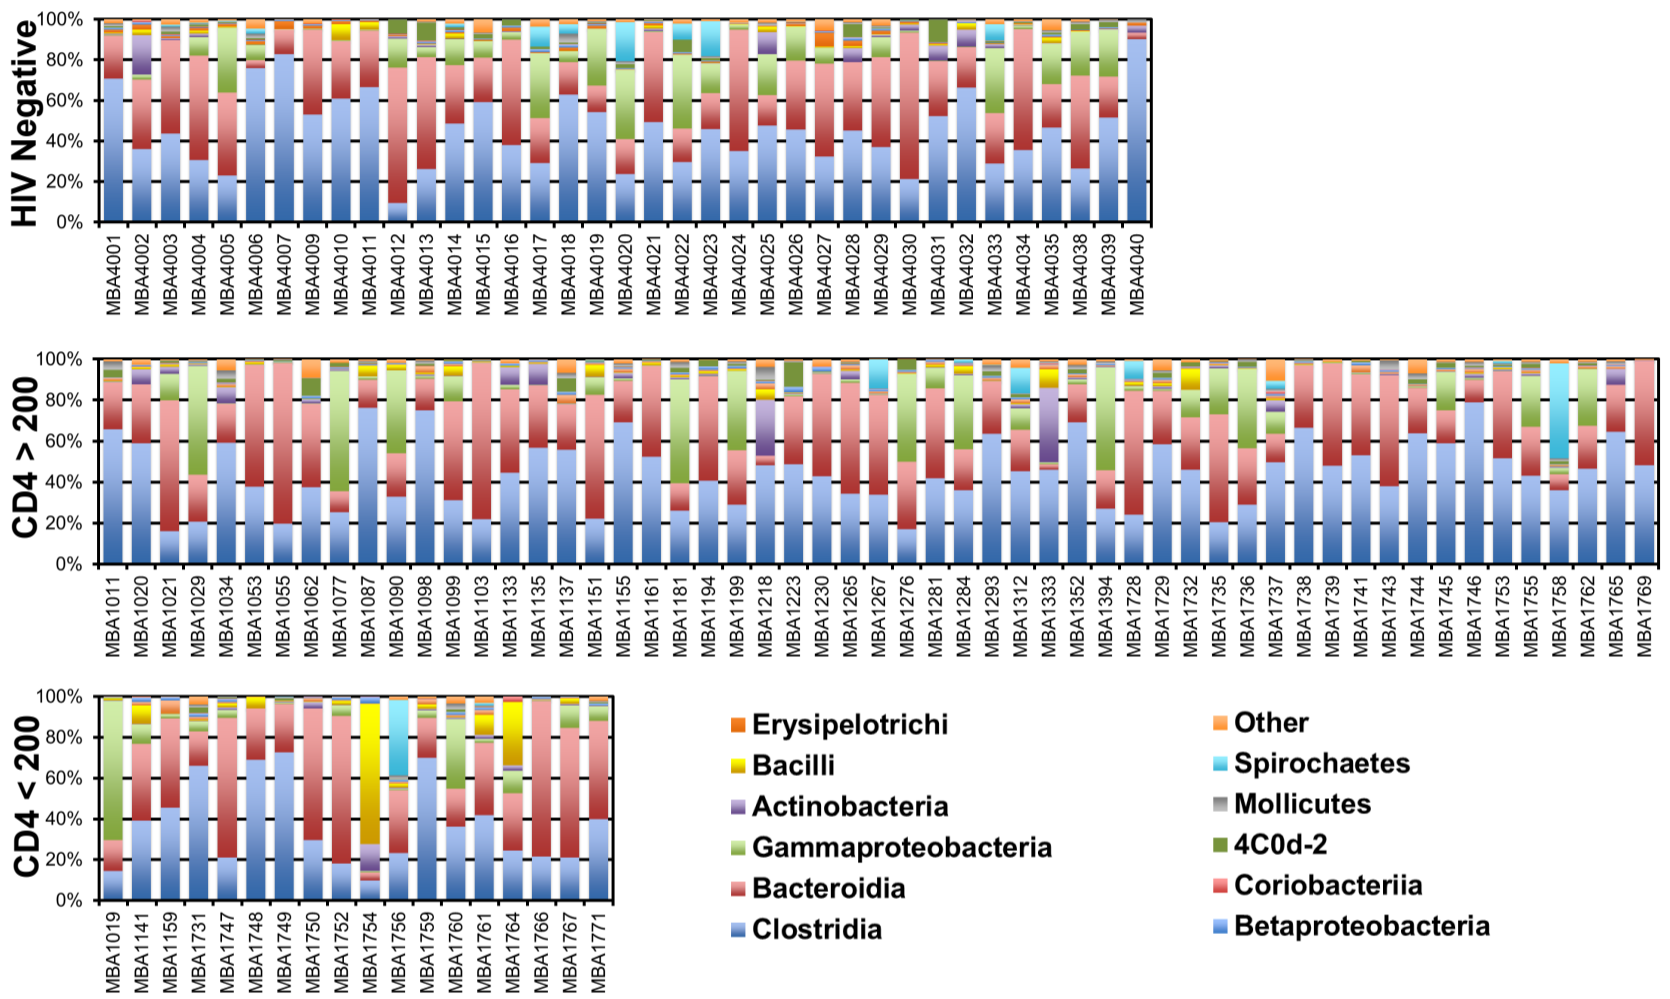

Figure S4, Related to Figure 4. Environmental and clinical associations with bacterial beta diversity.

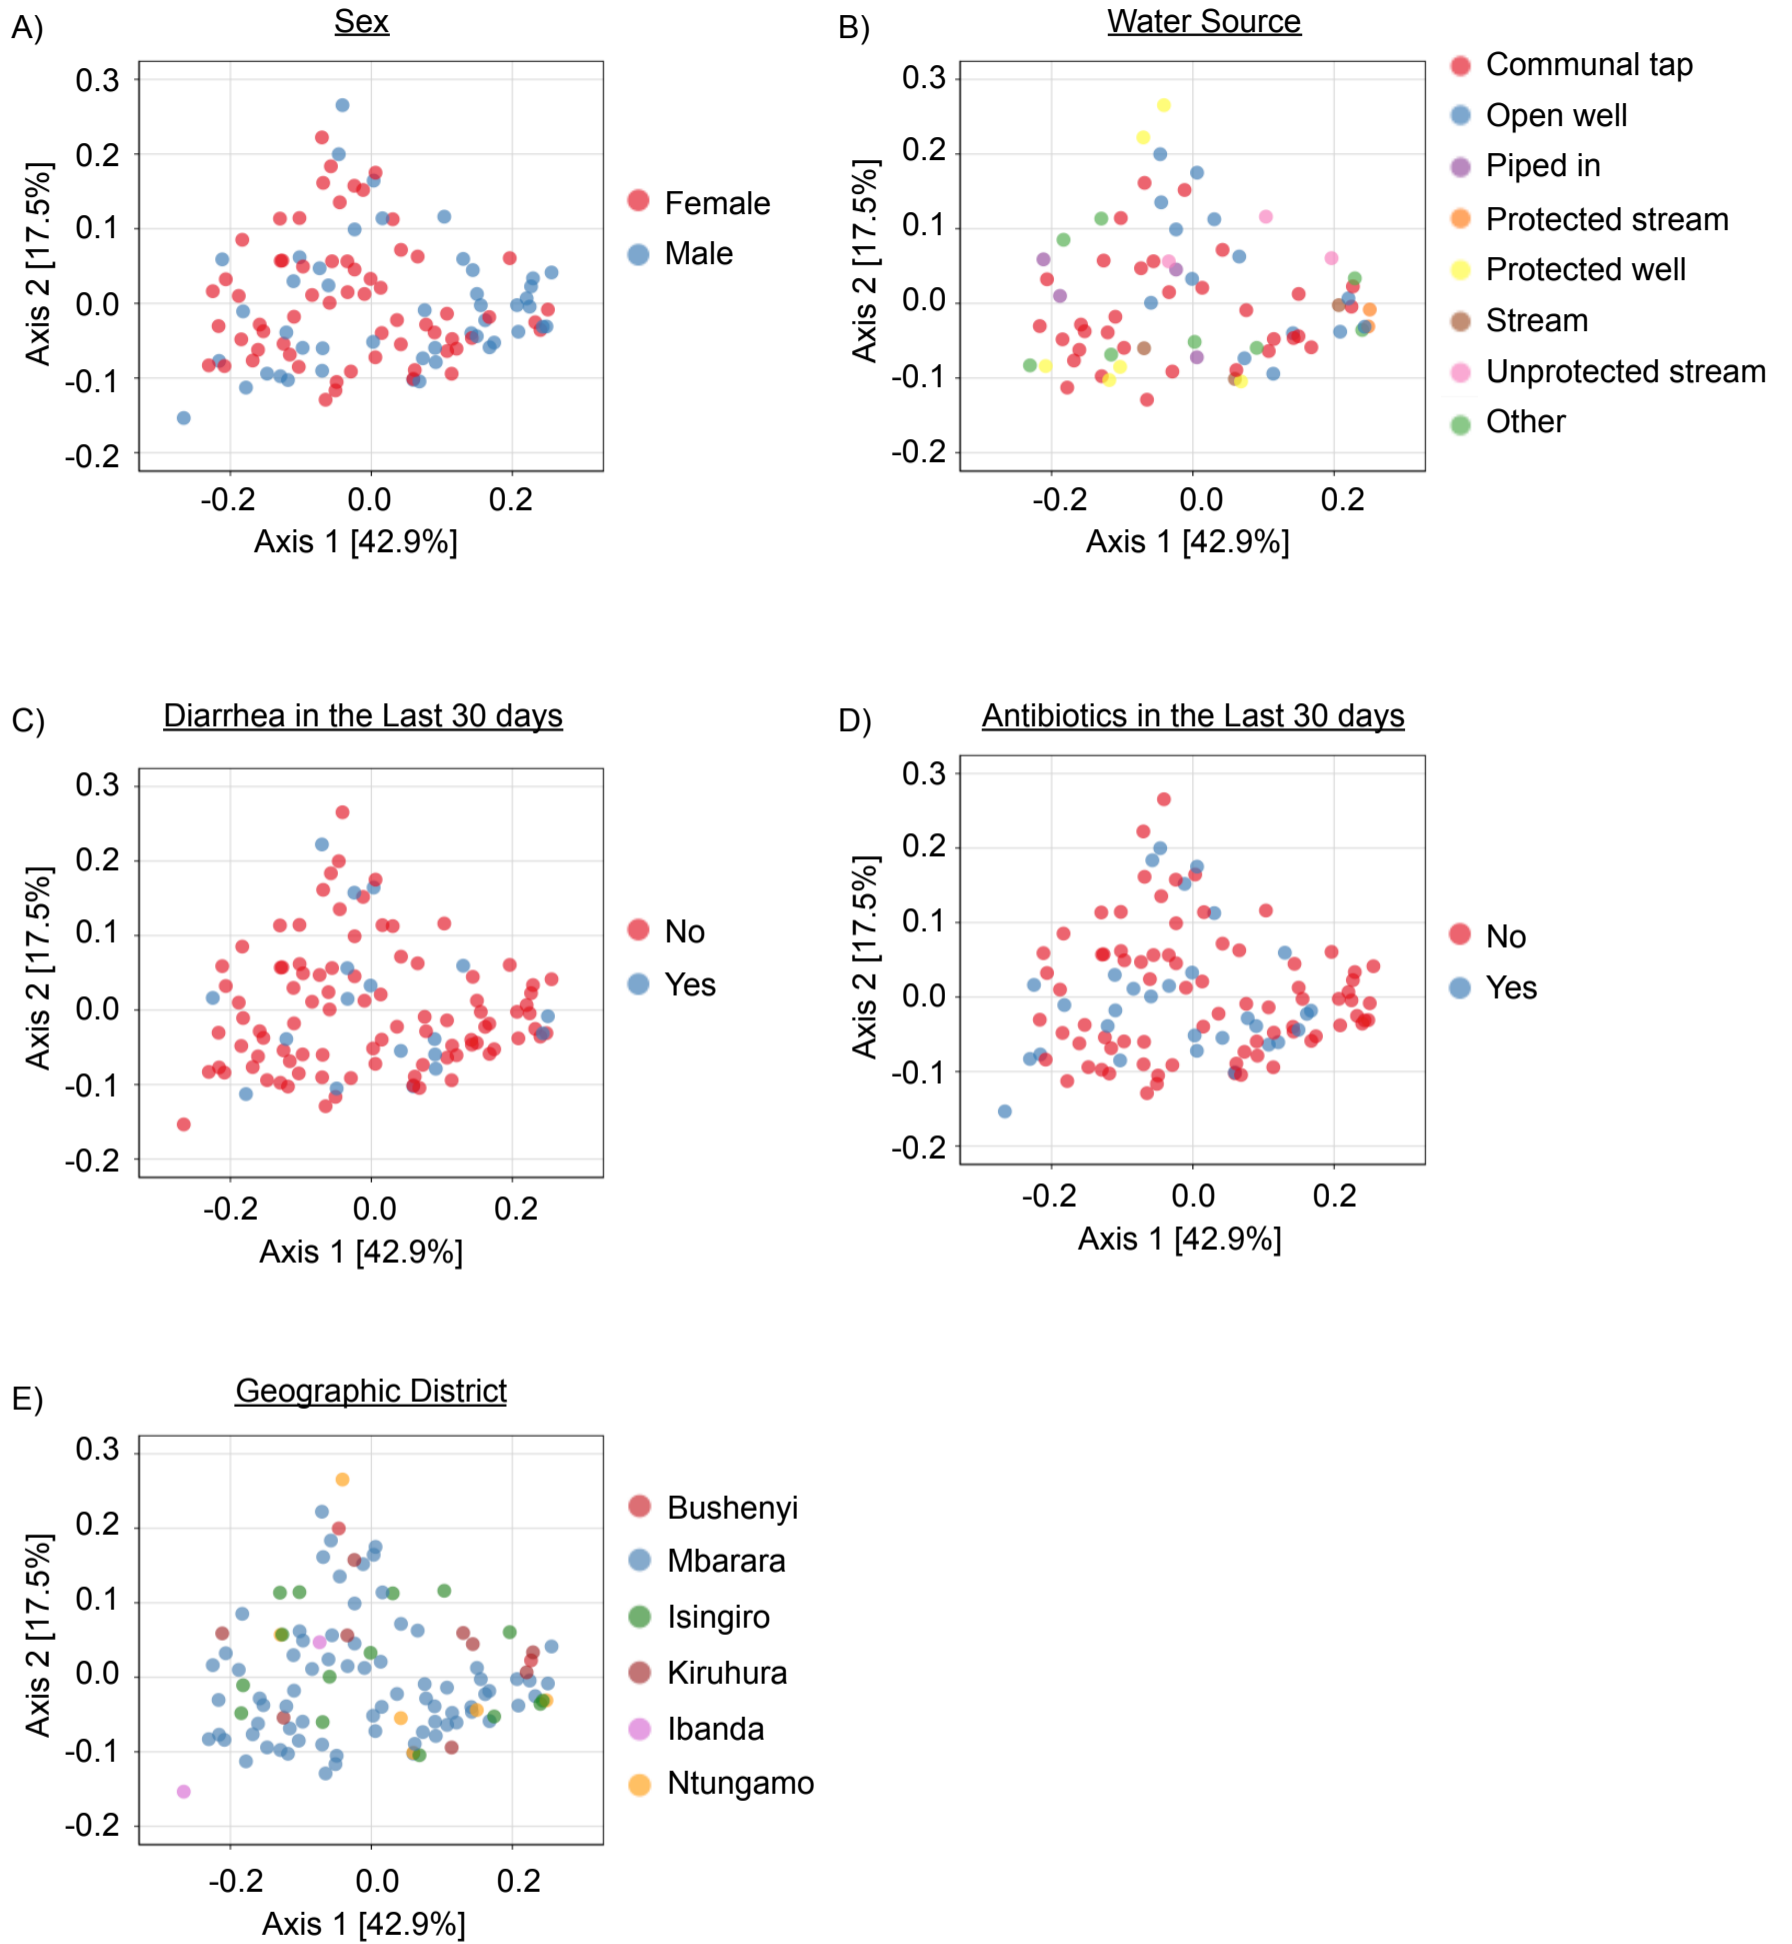

Figure S5, Related to Figure 3. Bacteriophage richness and diversity are unchanged in HIV.

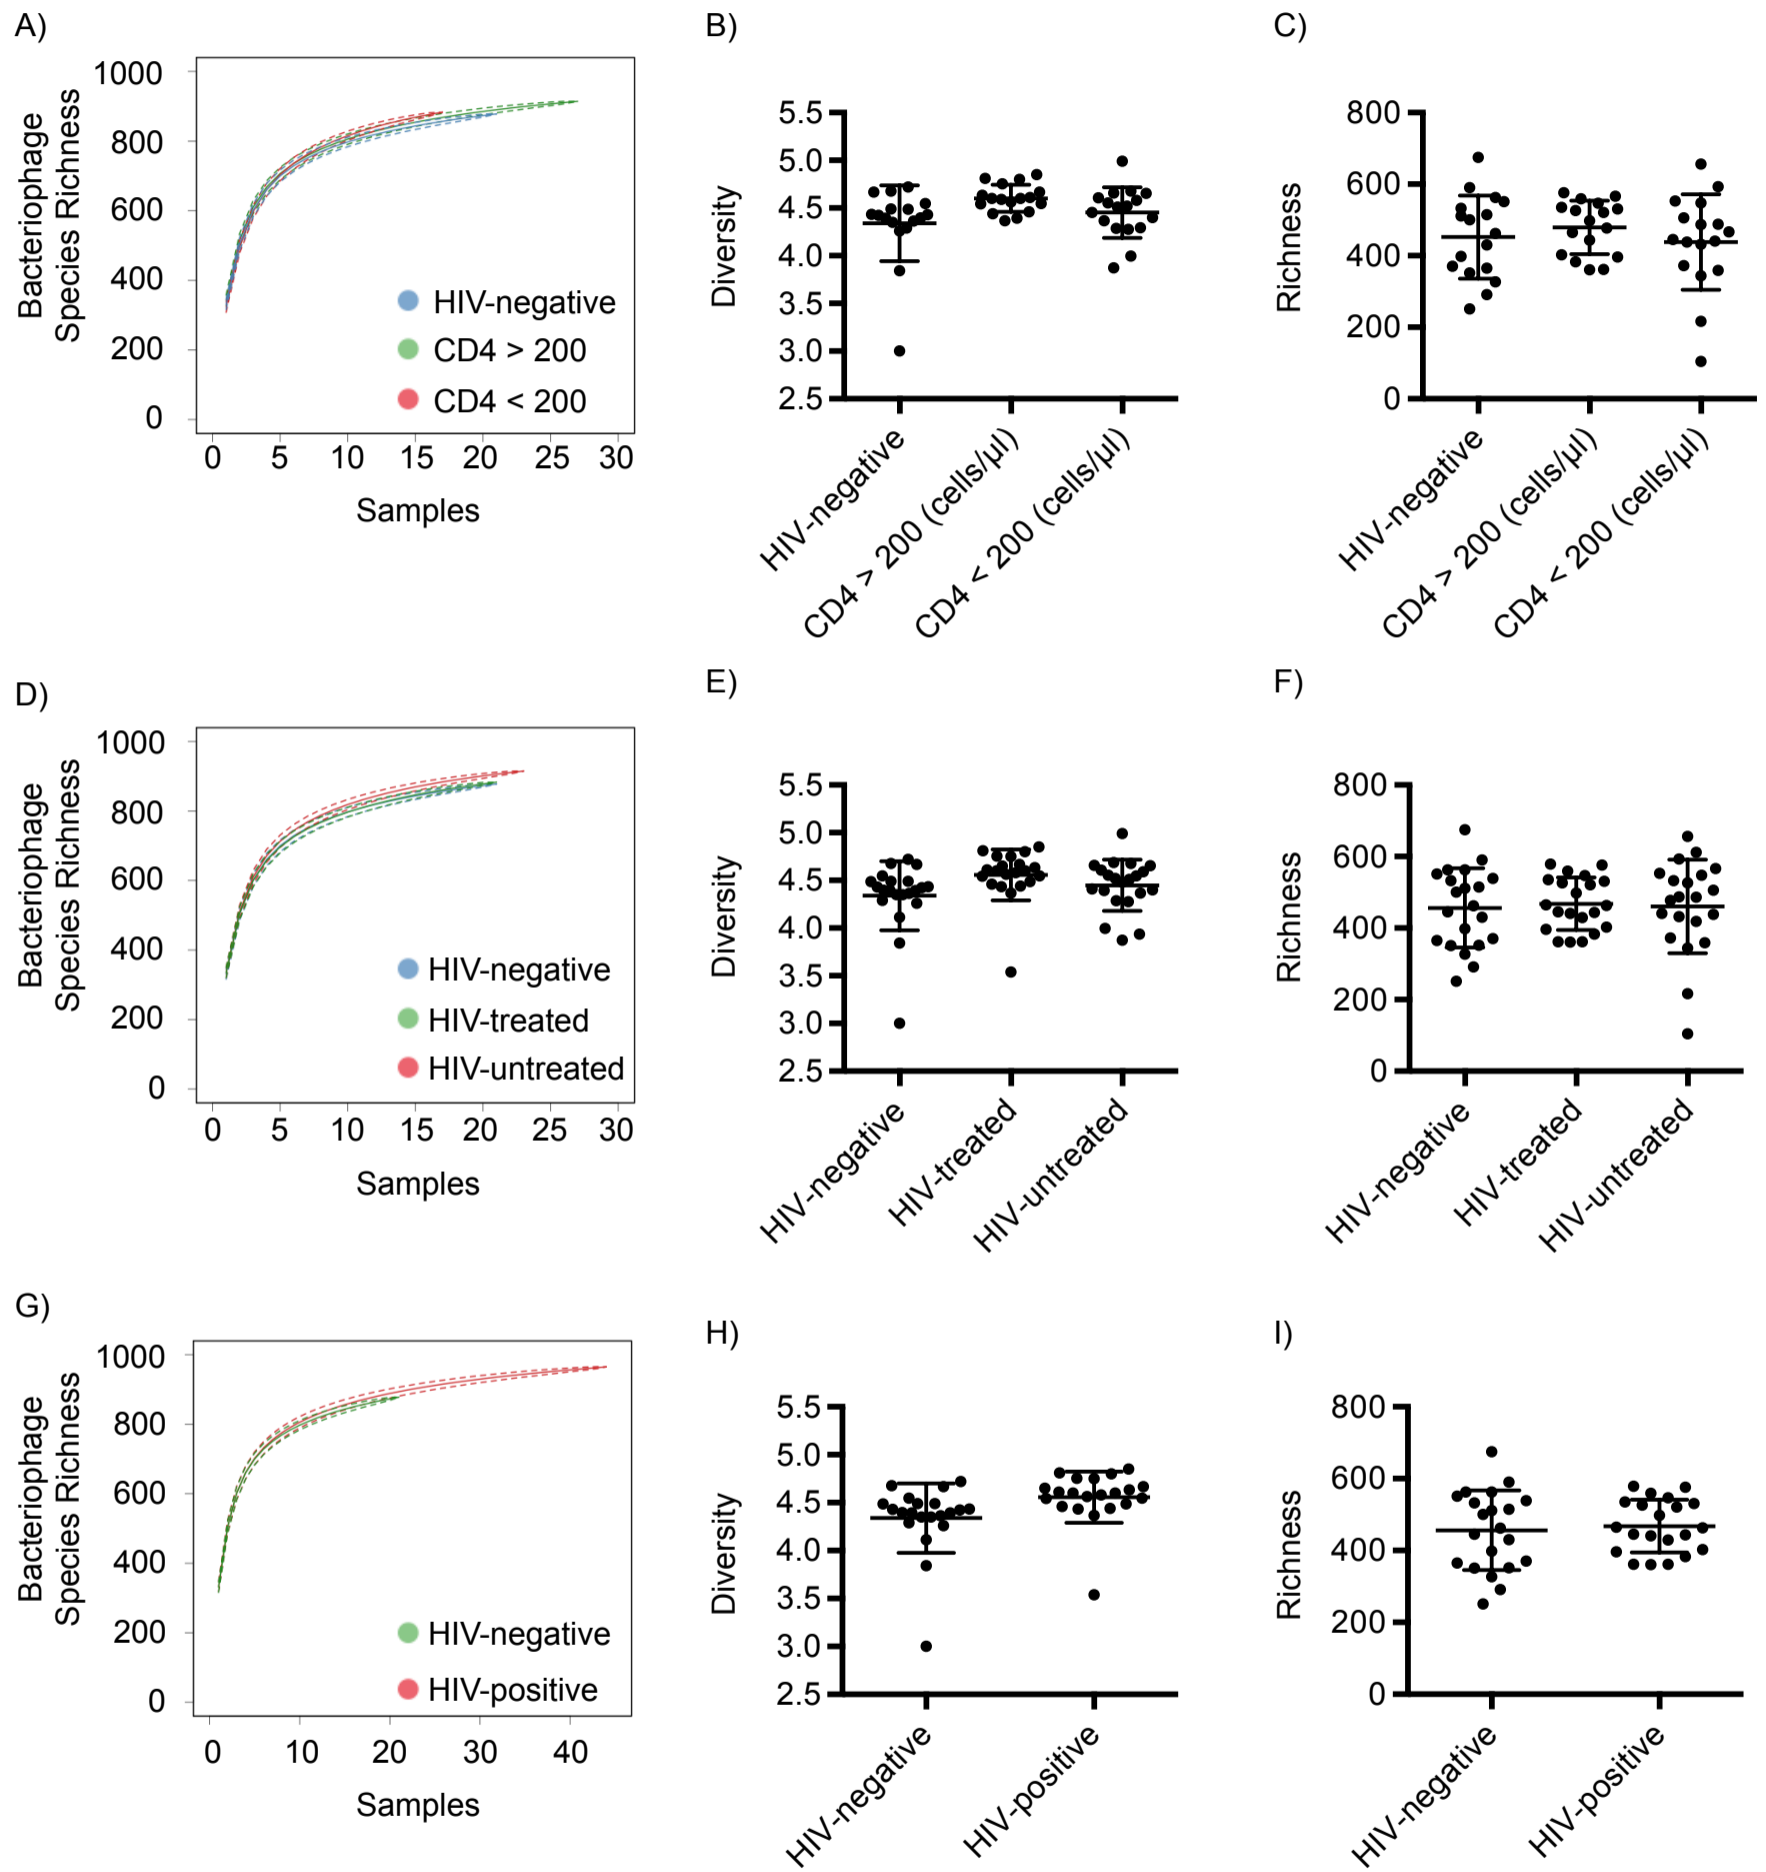

**SUPPLEMENTAL INFORMATION**

**SUPPLEMENTAL FIGURE LEGENDS**

**Figure S1, Related to Figure 2. Comparison of viral taxonomic assignment using blastx and VirusSeeker.** (A) Dereplicated reads were compared using BLASTx to a virus protein database. The 20 most abundant virally-assigned taxa detected from all samples are shown, grouped at NCBI’s taxonomic level of “family”. (B) Comparison of the BLASTx (Bx) results in (A) to results obtained after running sequences through the VirusSeeker (Vs) pipeline. Only eukaryotic viruses and NCBI classifiable viral families are displayed.  $p \leq 0.0001 = ****$ . Median is indicated by the horizontal line. See also Table S1.

**Figure S2, Related to Figure 3. Quantification and comparison of eukaryotic virus sequences detected in fecal samples.** Abundance of (A, E, I) Adenoviridae, (B, F, J) Anelloviridae, (C, G, K) Circoviridae and (D, H, L) Papillomaviridae virus sequences were normalized to total quality-controlled sequences and analyzed by HIV infection status (top row) and ART therapy (middle row). ART-naïve, HIV-untreated patients were further subdivided by CD4 T cell number  $>200$  ( $n=7$ ) or  $<200$  ( $n=16$ ) in a subgroup analysis (bottom row) as compared to samples from HIV-negative or HIV-treated subjects. As only one sample in the HIV-treated group had a CD4 T cell number  $< 200$ , this group was not further subdivided. Sequences were normalized by dividing by the number of dereplicated ( $<95\%$  identical), high-quality sequences. Statistical analysis was performed on untransformed data, and data was graphed after square root transformation.  $p \leq 0.05 = *$ . Bar indicates median.

**Figure S3, Related to Figure 4: Bacterial class-level taxa barplot by CD4 T cell number.** Relative abundance of bacterial taxa (y-axis) assigned to subjects (x-axis) as determined by 16S V4 sequencing was plotted and grouped by HIV Negative subjects (upper panel) and HIV-infected subjects with CD4 T cell number  $> 200$  (middle panel) or  $<200$  (lower panel). Color key is located at bottom right.

**Figure S4, Related to Figure 4: Environmental and clinical associations with bacterial beta diversity.** Principle Coordinate Analysis (PCoA) plots of the weighted UniFrac distances colored by (A) gender, (B) patient’s home water source, (C) reported diarrhea or (D) antibiotics usage in the 30 days preceding sample collection, and (E) patient’s home geographic district in Uganda.

**Figure S5, Related to Figure 3: Bacteriophage Richness and Diversity are unchanged in HIV.** Bacteriophage species accumulation plots rarefied by samples number over 1000 permutations were graphed by CD4 T cell number (A), HIV status and ART treatment group (D), and HIV infection status (G) with dotted lines representing 95% CI. Shannon diversity (y-axis) of bacteriophage species was determined and grouped by CD4 T cell count (B), HIV status and ART therapy (E), and HIV status (H). Species richness was determined and grouped by CD4 T cell count (C), HIV status and ART therapy (F), and HIV status (I). Bars indicate median  $\pm$  interquartile range (IQR).

**SUPPLEMENTAL TABLES:**

**Table S1, related to Table 1 and Figures 1: Viral sequence read statistics.**

| Ragon ID | HIV phenotype | Index  | Number of Paired reads | Number of reads after Stitching | number of QCed reads | % of Stitched reads | Number of deduplicated reads | % of Stitched reads |
|----------|---------------|--------|------------------------|---------------------------------|----------------------|---------------------|------------------------------|---------------------|
| MBA1011  | HIV-treated   | TGACCA | 887278                 | 1358660                         | 1159458              | 85.34               | 130432                       | 9.6                 |
| MBA1019  | HIV-treated   | TAGCTT | 986347                 | 1291422                         | 1229675              | 95.22               | 385904                       | 29.88               |
| MBA1021  | HIV-treated   | GGCTAC | 867024                 | 1165106                         | 983803               | 84.44               | 178015                       | 15.28               |
| MBA1029  | HIV-treated   | GATCAG | 916813                 | 1327735                         | 1179217              | 88.81               | 164662                       | 12.4                |
| MBA1034  | HIV-treated   | TAGCTT | 833915                 | 1267056                         | 1213408              | 95.77               | 230176                       | 18.17               |
| MBA1053  | HIV-treated   | CTTGTA | 1092591                | 1389298                         | 1277642              | 91.96               | 138327                       | 9.96                |
| MBA1055  | HIV-treated   | CAGATC | 839016                 | 1237461                         | 1138972              | 92.04               | 528988                       | 42.75               |
| MBA1062  | HIV-treated   | ATTCCT | 917080                 | 1241436                         | 1094998              | 88.2                | 201317                       | 16.22               |
| MBA1090  | HIV-treated   | ATCACG | 1401128                | 1841681                         | 1754951              | 95.29               | 492692                       | 26.75               |
| MBA1098  | HIV-treated   | CGATGT | 1262741                | 1688080                         | 1542193              | 91.36               | 745878                       | 44.18               |
| MBA1099  | HIV-treated   | TTAGGC | 1085055                | 1432604                         | 1312876              | 91.64               | 520828                       | 36.36               |

|         |               |        |         |         |         |       |         |       |
|---------|---------------|--------|---------|---------|---------|-------|---------|-------|
| MBA1103 | HIV-treated   | TGACCA | 1222037 | 1701853 | 1295897 | 76.15 | 250226  | 14.7  |
| MBA1133 | HIV-treated   | GGCTAC | 1334658 | 1849467 | 1709706 | 92.44 | 728140  | 39.37 |
| MBA1151 | HIV-treated   | GGCTAC | 1817015 | 2431224 | 2259607 | 92.94 | 865595  | 35.6  |
| MBA1155 | HIV-treated   | AGTCAA | 2119670 | 2941809 | 2426746 | 82.49 | 578439  | 19.66 |
| MBA1194 | HIV-treated   | CAGATC | 158740  | 245201  | 232044  | 94.63 | 145416  | 59.3  |
| MBA1218 | HIV-treated   | ACTTGA | 950837  | 1270738 | 1136246 | 89.42 | 159421  | 12.55 |
| MBA1267 | HIV-treated   | ATGTCA | 1195091 | 1555410 | 1469115 | 94.45 | 300758  | 19.34 |
| MBA1276 | HIV-treated   | CCGTCC | 818417  | 1166397 | 1116503 | 95.72 | 352567  | 30.23 |
| MBA1281 | HIV-treated   | GTCCGC | 1074371 | 1423265 | 1348973 | 94.78 | 653313  | 45.9  |
| MBA1312 | HIV-treated   | GTGAAA | 1070296 | 1396835 | 1291352 | 92.45 | 192329  | 13.77 |
| MBA1728 | HIV-Untreated | GATCAG | 1614597 | 2161450 | 2029126 | 93.88 | 772803  | 35.75 |
| MBA1730 | HIV-Untreated | TAGCTT | 1374725 | 1820599 | 1712034 | 94.04 | 831928  | 45.7  |
| MBA1731 | HIV-Untreated | ATCACG | 764253  | 997164  | 561687  | 56.33 | 39141   | 3.93  |
| MBA1736 | HIV-Untreated | CGATGT | 653711  | 1123519 | 1085243 | 96.59 | 515153  | 45.85 |
| MBA1738 | HIV-Untreated | TTAGGC | 815721  | 1061379 | 1028063 | 96.86 | 548074  | 51.64 |
| MBA1742 | HIV-Untreated | GTCCGC | 2291496 | 3042169 | 2945985 | 96.84 | 1263523 | 41.53 |
| MBA1747 | HIV-Untreated | GTGAAA | 1849711 | 2557903 | 2407033 | 94.1  | 1330295 | 52.01 |
| MBA1749 | HIV-Untreated | GCCAAT | 53590   | 77144   | 67556   | 87.57 | 51043   | 66.17 |
| MBA1750 | HIV-Untreated | AGTTCC | 890057  | 1562412 | 1512076 | 96.78 | 563318  | 36.05 |
| MBA1751 | HIV-Untreated | GGCTAC | 1165771 | 1549874 | 1469432 | 94.81 | 976821  | 63.03 |
| MBA1752 | HIV-Untreated | GCCAAT | 1036084 | 1346547 | 1050543 | 78.02 | 399374  | 29.66 |
| MBA1753 | HIV-Untreated | ACTTGA | 949969  | 1401006 | 1307710 | 93.34 | 616029  | 43.97 |
| MBA1754 | HIV-Untreated | CAGATC | 1174171 | 1595482 | 1503076 | 94.21 | 529697  | 33.2  |
| MBA1755 | HIV-Untreated | CGATGT | 851350  | 1162091 | 1111754 | 95.67 | 566070  | 48.71 |
| MBA1756 | HIV-Untreated | CTTGTA | 1297664 | 1852920 | 1475713 | 79.64 | 397954  | 21.48 |
| MBA1758 | HIV-Untreated | ACTTGA | 989986  | 1358905 | 1206807 | 88.81 | 145747  | 10.73 |
| MBA1759 | HIV-Untreated | AGTCAA | 1498550 | 2068138 | 1909440 | 92.33 | 738440  | 35.71 |
| MBA1760 | HIV-Untreated | CGTACG | 970521  | 1255234 | 1176361 | 93.72 | 260012  | 20.71 |
| MBA1761 | HIV-Untreated | GAGTGG | 1248156 | 1618701 | 1368571 | 84.55 | 183348  | 11.33 |
| MBA1764 | HIV-Untreated | ACTGAT | 1384862 | 1808384 | 1731582 | 95.75 | 1069159 | 59.12 |
| MBA1766 | HIV-Untreated | GATCAG | 864582  | 1152938 | 1033348 | 89.63 | 514394  | 44.62 |
| MBA1767 | HIV-Untreated | GGCTAC | 785837  | 1170065 | 1106865 | 94.6  | 520997  | 44.53 |
| MBA1771 | HIV-Untreated | CTTGTA | 857105  | 1313352 | 1234733 | 94.01 | 515975  | 39.29 |
| MBA4001 | HIV-negative  | ACAGTG | 1357848 | 1823927 | 1492501 | 81.83 | 198893  | 10.9  |
| MBA4009 | HIV-negative  | GCCAAT | 1465306 | 1953861 | 1693939 | 86.7  | 249601  | 12.77 |
| MBA4010 | HIV-negative  | CAGATC | 1453263 | 1879875 | 1625514 | 86.47 | 146245  | 7.78  |
| MBA4011 | HIV-negative  | ACTTGA | 1406838 | 1882138 | 1718968 | 91.33 | 161323  | 8.57  |
| MBA4012 | HIV-negative  | AGTTCC | 2296454 | 3183074 | 2920462 | 91.75 | 503355  | 15.81 |
| MBA4013 | HIV-negative  | ATGTCA | 2150661 | 2809970 | 2556579 | 90.98 | 887768  | 31.59 |
| MBA4014 | HIV-negative  | CCGTCC | 2103863 | 2769135 | 2653147 | 95.81 | 1559644 | 56.32 |
| MBA4020 | HIV-negative  | TAGCTT | 1089269 | 1415685 | 1380910 | 97.54 | 628801  | 44.42 |
| MBA4021 | HIV-negative  | GGCTAC | 874229  | 1178317 | 1132507 | 96.11 | 597540  | 50.71 |
| MBA4024 | HIV-negative  | ACAGTG | 929842  | 1275933 | 1143725 | 89.64 | 110449  | 8.66  |
| MBA4025 | HIV-negative  | GCCAAT | 888133  | 1354606 | 1258248 | 92.89 | 124114  | 9.16  |
| MBA4026 | HIV-negative  | ATCACG | 1072551 | 1471600 | 1280533 | 87.02 | 117249  | 7.97  |
| MBA4027 | HIV-negative  | CGATGT | 1022900 | 1356081 | 1276535 | 94.13 | 628308  | 46.33 |
| MBA4028 | HIV-negative  | TTAGGC | 785929  | 1334787 | 947717  | 71    | 257697  | 19.31 |
| MBA4029 | HIV-negative  | AGTCAA | 1044097 | 1393242 | 1094090 | 78.53 | 64319   | 4.62  |
| MBA4030 | HIV-negative  | GTGGCC | 950277  | 1225198 | 1151439 | 93.98 | 538827  | 43.98 |
| MBA4031 | HIV-negative  | ATCACG | 1217994 | 1851477 | 1781073 | 96.2  | 692072  | 37.38 |
| MBA4037 | HIV-negative  | GTTTCG | 1015898 | 1336728 | 1261423 | 94.37 | 711598  | 53.23 |
| MBA4038 | HIV-negative  | TGACCA | 806068  | 1105304 | 858404  | 77.66 | 152637  | 13.81 |
| MBA4039 | HIV-negative  | ACAGTG | 953760  | 1261375 | 1159538 | 91.93 | 596567  | 47.29 |
| MBA4040 | HIV-negative  | TTAGGC | 897440  | 1342816 | 1253838 | 93.37 | 483619  | 36.02 |

**Table S2, Related to Figure 2B: Papillomaviruses identified in the fecal sample collected from MBA1759, an HIV-infected, untreated subject.**

| #  | Contig Length (bp) | Fold Coverage | Complete Genome Length (bp) | Genus               | Most Closely Related HPV strain | Accession Number | Reference Genome Length (bp) | Sequence identity to Reference Genome (nt) |
|----|--------------------|---------------|-----------------------------|---------------------|---------------------------------|------------------|------------------------------|--------------------------------------------|
| 1  | 9325               | 654.5         | 7362                        | Gammapapillomavirus | Type 103                        | NC_008188.1      | 7263                         | 7259/7263 (99%)                            |
| 2  | 9055               | 9.7           | 7857                        | Alphapapillomavirus | Type 18                         | KC470213.1       | 7857                         | 7850/7857 (99%)                            |
| 3  | 8414               | 732.4         | 7790                        | Alphapapillomavirus | Type 56                         | EF177178.1       | 7790                         | 7779/7790 (99%)                            |
| 4  | 8142               | 468.7         | 8015                        | Alphapapillomavirus | Type 61                         | HPU31793         | 7989                         | 7893/8015 (98%)                            |
| 5  | 8025               | 12.3          | 7890                        | Alphapapillomavirus | Type 59                         | KC470262.1       | 7899                         | 7890/7898 (99%)                            |
| 6  | 8008               | 31.2          | 7882                        | Alphapapillomavirus | Type 30                         | X74474.1         | 7852                         | 7781/7890 (99%)                            |
| 7  | 7985               | 50.6          | 7858                        | Alphapapillomavirus | Type 45                         | EF202156.1       | 7858                         | 7854/7858 (99%)                            |
| 8  | 7966               | 5.1           | 7839                        | Alphapapillomavirus | Type 33                         | HQ537702.1       | 7838                         | 7834/7839 (99%)                            |
| 9  | 7942               | 233.8         | 7815                        | Alphapapillomavirus | Type 51                         | M62877.1         | 7808                         | 7728/7816 (99%)                            |
| 10 | 7844               | 116           | 7717                        | Alphapapillomavirus | Type 54                         | AF436129.1       | 7717                         | 7711/7717 (99%)                            |
| 11 | 7833               | 66.5          | 7706                        | Alphapapillomavirus | Type 73                         | X94165.1         | 7700                         | 7619/7706 (99%)                            |
| 12 | 7805               | 148.7         | 7678                        | Alphapapillomavirus | Type 69                         | AB027020.1       | 7700                         | 7616/7705 (99%)                            |

HPV: human papillomavirus

**Table S3, Related to Figure 2D: Number of ORF-1 verified anellovirus contigs per sample.**

| Ragon ID | CD4 group (cells/ml) | ORF-1 verified contigs (n) |
|----------|----------------------|----------------------------|
| MBA4024  | HIV Negative         | 4                          |
| MBA4026  | HIV Negative         | 2                          |
| MBA1758  | Greater than 200     | 4                          |
| MBA1731  | Less than 200        | 5                          |
| MBA1747  | Less than 200        | 6                          |
| MBA1751  | Less than 200        | 1                          |
| MBA1752  | Less than 200        | 7                          |
| MBA1761  | Less than 200        | 19                         |
| MBA1759  | Less than 200        | 3                          |

**Table S4, Related to Figure 3: Association between presence of specific viral sequences and patients with low CD4 T cells (< 200).**

| Virus            | Overall                       | CD4 < 200 vs. HIV negative    |                    |            | CD4 < 200 vs. CD4 > 200       |                    |            |
|------------------|-------------------------------|-------------------------------|--------------------|------------|-------------------------------|--------------------|------------|
|                  | Fisher's exact <i>p</i> value | Fisher's exact <i>p</i> value | FDR <i>p</i> value | Odds Ratio | Fisher's exact <i>p</i> value | FDR <i>p</i> value | Odds Ratio |
| Adenoviridae     | 0.0031**                      | 0.0062**                      | 0.0129*            | 8.022      | 0.0064**                      | 0.0129*            | 7.746      |
| Anelloviridae    | 0.0409*                       | 0.0990                        | 0.0990             | 3.445      | 0.0238*                       | 0.0317*            | 4.796      |
| Circoviridae     | 0.8746                        | NA                            | NA                 | NA         | NA                            | NA                 | NA         |
| Papillomaviridae | 0.1253                        | NA                            | NA                 | NA         | NA                            | NA                 | NA         |

$p \leq 0.05 = *$ ,  $p \leq 0.01 = **$



**Table S5, Related to Figure 5: Differentially abundant bacterial taxa in subjects with low CD4 T cell counts and bacterial OTUs significantly associated with sCD14.**

**Tab 1: Differentially abundant bacterial taxa in subjects with CD4 <200 compared to HIV-negative subjects.**

**Tab 2: Differentially abundant bacterial taxa in subjects with CD4 <200 compared to subjects with CD4 > 200.**

**Tab 3: Bacterial OTUs significantly associated with sCD14.**

**Table S6, Related to Figure 5: OTUs significantly associated with CD4 T cell number using a multivariate model including CD4 T cell group, age, month stool collected, sequencing run, BMI, and other antibiotic use**

| Phyla          | Class               | Order             | Family             | Genus species              | OTU ID  | Raw <i>p</i> value | FDR <i>p</i> value |
|----------------|---------------------|-------------------|--------------------|----------------------------|---------|--------------------|--------------------|
| Firmicutes     | Clostridia          | Clostridiales     | Clostridiaceae     | NA                         | 575768  | 9.52E-05           | 0.021052           |
| Firmicutes     | Clostridia          | Clostridiales     | Ruminococcaceae    | Oscillospira               | 187267  | 0.000124           | 0.025939           |
| Bacteroidetes  | Bacteroidia         | Bacteroidales     | NA                 | NA                         | 343635  | 0.000202           | 0.035365           |
| Proteobacteria | Gammaproteobacteria | Enterobacteriales | Enterobacteriaceae | NA                         | 782953  | 1.99E-05           | 0.006693           |
| Proteobacteria | Gammaproteobacteria | Enterobacteriales | Enterobacteriaceae | NA                         | 1111294 | 2.18E-05           | 0.007057           |
| Proteobacteria | Gammaproteobacteria | Enterobacteriales | Enterobacteriaceae | NA                         | 292289  | 2.27E-05           | 0.007059           |
| Proteobacteria | Gammaproteobacteria | Enterobacteriales | Enterobacteriaceae | NA                         | 1108656 | 2.43E-05           | 0.007285           |
| Proteobacteria | Gammaproteobacteria | Enterobacteriales | Enterobacteriaceae | NA                         | 4354477 | 8.57E-05           | 0.020022           |
| Proteobacteria | Gammaproteobacteria | Enterobacteriales | Enterobacteriaceae | Cronobacter dublinensis    | 667570  | 0.00016            | 0.030496           |
| Proteobacteria | Gammaproteobacteria | Enterobacteriales | Enterobacteriaceae | NA                         | 581782  | 0.000235           | 0.039434           |
| Firmicutes     | Clostridia          | Clostridiales     | NA                 | NA                         | 4480176 | 0.000295           | 0.047616           |
| Proteobacteria | Gammaproteobacteria | Pasteurellales    | Pasteurellaceae    | Haemophilus parainfluenzae | 4347099 | 0.000308           | 0.047998           |
| Firmicutes     | Clostridia          | Clostridiales     | Ruminococcaceae    | NA                         | 199182  | 0.00033            | 0.048476           |
| Firmicutes     | Bacilli             | Lactobacillales   | Streptococcaceae   | Streptococcus              | 888300  | 0.000331           | 0.048476           |

**Table S7, Related to Figure 4: Correlations between bacteriophage and bacterial richness and diversity by CD4 T cell grouping**

| Sample Group | Richness            |                | Shannon Diversity   |                |
|--------------|---------------------|----------------|---------------------|----------------|
|              | Spearman's <i>r</i> | <i>p</i> value | Spearman's <i>r</i> | <i>p</i> value |
| HIV-negative | -0.1687             | 0.4770         | 0.1378              | 0.5624         |
| CD4 < 200    | -0.4210             | 0.7550         | -0.1093             | 0.6981         |
| CD4 > 200    | 0.0123              | 0.9524         | 0.1600              | 0.4348         |

## SUPPLEMENTAL EXPERIMENTAL PROCEDURES

### sCD14 Measurements in Plasma

Plasma was collected in acid citrate dextrose tubes and aliquots underwent a single freeze-thaw cycle before analysis. sCD14 concentration was measured by ELISA (R&D Systems Human sCD14 Quantikine ELISA kit #DC140). Samples were thawed on ice, centrifuged for 10 minutes at 1,000 x *g* and 4°C, and the supernatant was diluted 200-fold in Calibrator Diluent RD5P (1X, R&D Systems) per the manufacturer's instructions (10 µL sample + 1990 µL Calibrator Diluent RD5P). Samples were tested in duplicate with standards on every plate. sCD14

concentration was determined from optical density (O.D.) measurements by subtracting the average zero standard O.D. and performing a log-log transformation of the standards in order to fit a linear regression.

## **Virus-Like Particle Enrichment and Sequencing**

### ***Virus-Like Particle Preparation***

VLPs were enriched from pulverized human stool as previously described (Reyes et al., 2010; Thurber et al., 2009). Approximately 200mg of stool was suspended in 400ul saline-magnesium buffer (0.1M NaCl, 0.008M MgSO<sub>4</sub>·7H<sub>2</sub>O, 0.002% gelatin, 0.05M Tris pH7.5) by vortexing for 10 minutes. Stool suspensions were then cleared by centrifugation at 2000 x *g* to remove debris and cells. Clarified suspensions were passed through one 0.45µm filter followed by two 0.22µm filters to remove residual host and bacterial cells. Samples were treated with lysozyme (1µg/ml at 37°C for 30 minutes) followed by chloroform (0.2x volume at RT for 10 minutes) to degrade remaining bacterial and host cell membranes. A DNase cocktail (10U Tubro DNaseI (Ambion), 1U Baseline zero DNase (Epicentre)) was used to remove contaminating host and bacterial DNA, followed by heat inactivation of DNases at 65°C for 10 minutes. VLPs were lysed (3.8% SDS plus 38µg/ml Proteinase K at 56°C for 20 minutes), treated with CTAB (2.5% CTAB plus 0.5M NaCl at 65°C for 10 minutes), and nucleic acid was extracted with phenol:chloroform pH 8.0 (Invitrogen). The aqueous fraction was washed once with an equal volume of chloroform and purified using DNeasy Blood and Tissue kit column (Qiagen). VLP DNA was amplified for 2 hours using Phi29 polymerase (GenomiPhi V2 kit, GE Healthcare) prior to sequencing. To reduce amplification bias, four independent reactions with 2µl of template were pooled for each sample (Reyes et al., 2010). Six samples failed amplification. Amplified VLP DNA (200ng) was fragmented by ultra-sonication (Covaris E210) before library construction (NEBNext Ultra DNA kit, New England Biolabs). Equimolar pools (ca. 12 samples/run) were sequenced on Illumina MiSeq platform (Washington University Center for Genome Sciences; 2 x 250bp run, loading at around 7pM, 1% PhiX spike-in) generating an average of over 1 million sequences per sample.

### ***Assignment of VLP Reads Taxonomy***

Detection of potentially ambiguous or false-positive viral sequences was done using VirusSeeker, a custom bioinformatics pipeline designed to detect sequences sharing nucleotide and protein level sequence similarity to known viruses (Zhao et al., submitted). Briefly, sequences are adapter-trimmed, quality controlled and dereplicated (removing sequences that are >95% identical). Potential unique viral reads were queried against the NCBI nt/nr databases, and only reads matching exclusively to viral sequences were kept for further analysis. All sequences aligning to viruses were further classified into viral families based on the NCBI taxonomic identity of the best hit.

### ***VLP Sequence Analysis***

Data were normalized by dividing individual taxon-assigned sequence counts by the total deduplicated quality controlled reads in a sample. Ecological parameters including richness and diversity were calculated using the diversityresult function of BiodiversityR package (Kindt, 2005). Heatmaps were generated using the vegan R package (Oksanen et al., 2013), and the heatmap.2 function of the gplots R packages (Warnes et al., 2015).

### ***Virus contig analysis***

Contigs were *de novo* assembled from paired-end reads for each sample using the SPAdes assembler (v 2.5.1) with kmer lengths of 77, 99, and 127 (Bankevich et al., 2012) and a minimum contig length of 500 bp. Sequences were deduplicated using CD-HIT (Fu et al., 2012; Li and Godzik, 2006) at 95% nucleotide identity and 95% length overlap cutoff. To determine the presence of *Adenoviridae*, *Anelloviridae*, *Circoviridae* and *Papillomaviridae* within the assembled sequence data, a blast database was created using reference genome sets by searching the NCBI nucleotide database for the selected family and narrowing search results by adding the filters “virus”, “genomic DNA/RNA”, and “RefSeq database”. tBlastx with a bit score cutoff of 100 was used to determine contigs with significant sequence similarity to reference genomes. Contigs were parsed in MEGAN (v5.8) (Huson et al., 2011) using the lowest-common ancestor algorithm with the following settings: Min Support: 1, Min Score: 100, Max Expected: 1e-10, Top Percent: 10.0, Min Complexity: 0.44 with the Min-Complexity Filter turned off. Candidate contig sequences were queried against the NCBI nr/nt databases to identify viral sequences that share similarity with only viruses.

### ***Anellovirus Phylogenetic Analysis***

Anellovirus-assigned contigs sharing greater than 95% sequence identity were deduplicated using the BBTools package (<http://sourceforge.net/projects/bbmap/>) and aligned to a conserved region of ORF1 (amino acid position 69

– 272 of reference TTV1 ORF1, NC\_002076) of 40 representative anellovirus genomes using MUSCLE (Edgar, 2004). Phylogenetic trees were constructed from an amino acid alignment with the following reference anelloviruses: (alphatorquevirus) TTV LTT6 (EU305674), TTV 1 (NC\_002076), TTV 2 (NC\_014480), TTV 3 (NC\_014081), TTV 4 (NC\_014069), TTV 6 (NC\_014094), TTV 7 (NC\_014080), TTV 8 (NC\_014084), TTV 10 (NC\_014076), TTV 12 (NC\_014075), TTV 14 (NC\_014077), TTV 15 (NC\_014096), TTV 16 (NC\_014091), TTV 19 (NC\_014078), TTV 25 (NC\_014083), TTV 26 (NC\_014079), TTV 27 (NC\_014074), TTV 28 (NC\_014073); (betatorquevirus) TTmV 6 (NC\_014095), TTmV 7 (NC\_014082), TTmV 9 (NC\_002195); (gammatorquevirus) small anellovirus 1 (NC\_007013), TTmV 1 (NC\_009225), TTmV 2 (NC\_014093). Maximum likelihood phylogenies were constructed with PhyML (version 20120412) (Guindon and Gascuel, 2003) using the LG substitution model. A discrete  $\gamma$  distribution of 4 rate categories was used to model heterogeneity among sites and support was assessed by 1000 nonparametric bootstraps. Phylogenies were visualized with FigTree (<http://tree.bio.ed.ac.uk/software/figtree/>).

### **Torque Teno Virus Real-Time PCR**

TaqMan quantitative real-time PCR was performed to detect and quantify anellovirus in MDA amplified samples (Maggi et al., 2003; Walton et al., 2014) using primers specific for alphatorqueviruses. All reactions were performed in at least duplicate in a blinded manner. Each reaction was performed in 25ul total volume including 5ul of MDA product, AmpliTaq gold (Life Technologies), 0.9uM AMTS forward primer (5' GTGCCGIAGGTGAGTTTA 3'; I is inosine), 0.9uM AMTAS reverse primer (5' AGCCCGGCCAGTCC 3'), 250nM AMTPTU probe 5' 6-FAM/ZEN/3IBFQ (5' TCAAGGGGCAATTCGGGCT 3'; Integrated DNA Technologies). The primers and probe target a highly conserved TTV genome segment described previously (Maggi et al., 2003; Walton et al., 2014). Cycling conditions were as follows: 50C for 2 minutes, 95C for 10 minutes then 40 cycles of 95C for 15 sec and 60C for 1 minutes. Reactions were performed on a StepOne Plus real-time PCR system (Applied Biosystems) and analyzed with StepOne Software v2.3. A plasmid control containing the TTV target was synthesized and used to generate a standard curve. The linear range of the assay was from 2e9 to 2e3 copies/ml. When both PCR reactions were positive we counted this as a positive (n = 31). When both were negative we counted this as a negative (n = 34). When there were disparate results from the two reactions, we called these indeterminate (n = 9). For purposes of analysis we took the conservative approach of requiring both reactions to be positive to call a sample 'present' for anellovirus. For statistical purposes we therefore grouped negative and indeterminate together.

### **Bacterial 16S rRNA Analysis**

#### ***Stool Pulverization***

Aliquots of pulverized human stool (100-200mg) were processed as previously described (Reyes et al., 2013). Briefly, stool was chipped from RNAlater on liquid nitrogen, samples were pulverized, aliquotted (approximately 200mg stool each) into 2-3 separate 2mL collections tubes (Starstedt) and stored at -80°C until use. Aliquots were used for total nucleic acid (TNA) extraction and VLP preparation, ensuring that similar parts of the stool samples were used for both extraction methods.

#### ***Human Stool Total Nucleic Acid Extraction***

Stool TNA was extracted from aliquots of pulverized human stool (~200mg) as previously described (Reyes et al., 2013) with modification. Briefly, 200µl of 1 mm diameter zirconia/silica beads (Biospec) were added to individual pulverized stool aliquots. 500µL of phenol:chloroform:isoamyl alcohol (Fisher Scientific, 25:24:1, pH 8.0), 500µL of 0.2µm-filtered 2x Buffer A (200mM NaCl, 200mM Tris, 20mM EDTA), and 210µL of 20% SDS were added to each sample. Samples were chilled on ice and homogenized using the highest setting on a BioSpec Mini-Beadbeater for 2 minutes at 4°C. The homogenized samples were then centrifuged at 4°C for 3 minutes at 7000 x g, and the aqueous phase was transferred to a clean tube. An equal volume of phenol:chloroform:isoamyl alcohol was added and mixed by vortexing. Samples were centrifuged at 16,000 x g for 5 minutes at room temperature and the aqueous phase transferred to a clean tube. Nucleic acid was precipitated with isopropanol and 3M sodium acetate (pH 5.5, Ambion) at -80°C for 20 minutes, then spun at maximum speed at 4°C for 30 minutes. The pellet was washed with 500µl 100% ethanol, centrifuged at 16,000 x g for 15 minutes at 4°C, dried, and resuspended in 200ul of molecular grade Tris-EDTA buffer (Ambion). DNA was isolated from the total nucleic acid preparation using an AllPrep DNA/RNA Micro Kit (Qiagen) according to the manufacturer's instructions. Nine samples resulted in insufficient quantity of DNA for 16S studies.

#### ***16S rRNA Amplification and Sequencing***

Primer selection and polymerase chain reaction was performed as described previously (Caporaso et al., 2011). Briefly, each sample was amplified in triplicate, pooled, and confirmed by gel electrophoresis. PCR reactions contained 2.5µL 10X High Fidelity PCR Buffer (Invitrogen), 18.8µL RNase/DNase-free water, 0.5µL 10 mM dNTPs, 1µL 50mM MgSO<sub>4</sub>, 0.5µL each of the forward and reverse Golay-barcoded primers specific for the V4 region (F515/R806, 10µM final concentration), 0.1µL Platinum High Fidelity Taq (Invitrogen) and 3µL extracted total nucleic acid. Reactions were held at 94°C for 2 minutes to denature the DNA, with amplification for 26 cycles of 94°C for 15s, 50°C for 30s, and 68°C for 30s; a final extension of 2 minutes at 68°C (to ensure complete amplification). Amplicons were pooled and purified using 0.6x Agencourt Ampure XP beads (Beckman-Coulter) according to the manufacturer's instructions. The final pooled samples were sequenced on the Illumina MiSeq platform (Washington University Center for Genome Sciences; 2x250 standard run) in two separate runs.

### 16S rRNA Analysis

Analysis of R1 16S sequence data was performed using QIIME (Quantitative Insights Into Microbial Ecology, version 1.9.1) (Caporaso et al., 2010). Raw sequence fastq files were quality filtered and demultiplexed using default parameters with the following exceptions: PHRED quality score cut-off at 20, and reverse-complement mapping barcodes were used. Closed reference operational taxonomic units (OTUs) sharing 97% identity were clustered using the UCLUST algorithm (Edgar, 2010) and assigned taxonomy according to the Greengenes database (version 13.8) (McDonald et al., 2012). To standardize differences in the number of OTUs between sequencing runs, all samples were rarefied to 5000 OTUs (10 iterations without replacement; maximum of 5000 OTUs per sample; 10 rarefaction steps) and the relative number of sequences assigned to each OTU was calculated for each sample. Two samples did not achieve high enough OTUs for downstream analysis. Alpha diversity analysis was performed on rarefied data. Faith's phylogenetic diversity (Faith and Baker, 2006) and the Chao1 richness metric were calculated for all ten rarefied tables. Statistical analysis between groups was performed using the `compare_alpha_diversity.py` function of QIIME. Species accumulation rarefactions plots were determined using the `specaccum` function of the `vegan` R package (Oksanen et al., 2013). Beta-diversity was determined in Phyloseq (v1.10.0) (McMurdie and Holmes, 2012) using weighted UniFrac distances. Differential abundance of bacterial taxa between experimental groups was determined using the PhyloSeq DESeq2 extension using the Wald significance test and a parametric fit type (v.1.6.3) (Anders and Huber, 2010; McMurdie and Holmes, 2012).

### Oligotyping

We performed oligotyping analyses (Eren et al., 2011) on differentially abundant 16S V4 sequencing reads assigned by QIIME to the *Ruminococcus* genera or *Enterobacteriaceae* family that were not previously resolved at the species level. Sequences shorter than the indicated length when trimmed to Phred score >30 were removed before analysis to prevent excessive variation due to sequencing error. Representative sequences for each oligotype were searched in the BLAST nr/nt database. The following table details the parameters for each performance of oligotyping. Representative sequences for each oligotype are indicated below.

| Oligotyping Group                                                       | Minimum Read Length | Total Full-Length Reads | Reads Assigned to Oligotypes | Minimum Sequences per Oligotype (-A parameter) | Oligotype Base Locations of Interest                                                                                    | Taxa assigned                                                   |
|-------------------------------------------------------------------------|---------------------|-------------------------|------------------------------|------------------------------------------------|-------------------------------------------------------------------------------------------------------------------------|-----------------------------------------------------------------|
| PhyloSeq, <i>Ruminococcus</i> sp. enriched in CD4 >200 vs. CD4 <200     | 230                 | 191993                  | 134162 (0.699)               | 2000                                           | 25 Bases: 0, 8, 9, 12, 57, 58, 68, 79, 94, 95, 98, 112, 158, 174, 177, 178, 181, 201, 212, 229, 232, 236, 237, 242, 249 | <i>R. bromii</i><br><i>R. callidus</i>                          |
| PhyloSeq, <i>Ruminococcus</i> sp. enriched in HIV-negative vs. CD4 <200 | 0                   | 109848                  | 80909 (0.737)                | 2000                                           | 19 Bases: 0, 9, 77, 98, 148, 158, 174, 178, 181, 201, 212, 225, 229, 232, 236, 237, 238, 242, 249                       | <i>R. bromii</i>                                                |
| MaAsLin, <i>Enterobacteriaceae</i> enriched in CD4 <200                 | 240                 | 111936                  | 100009 (0.893)               | 1000                                           | 15 Bases: 0, 28, 57, 113, 138, 183, 189, 223, 226, 228, 232, 238, 242, 243, 249                                         | <i>Shigella</i> sp. or a closely-related <i>Escherichia</i> sp. |

PhyloSeq, *Ruminococceae Ruminococcus* sp. enriched in CD4 >200 vs. CD4 <200

>Oligotype TGAATTTAAATTTGGAACCTAACGTC

TACGTAGGGAGCAAGCGTTGTCCGATTTACTGGGTGTAAAGGGTGCCTAGGCGGCTTTGCAAGTCAG  
ATGTGAAATCTATGGGCTCAACCCATAAACTGCATTTGAAACTGTAGAGCTTGAGTGAAGTAGAGGCA  
GGCGGAATTCCTCGTGTAGCGGTGAAATGCGTAGAGATGGGGAGGAACACCAGTGCGCAAGGCGGCC  
TGCTGGGCTTTAACTGACGCTGAGGCACGAAAGCGTGGGTAGCAAAC

> Oligotype TGAGTGAAAGTTTCGAACTTACGGC

TACGTAGGGAGCGAGCGTTGTCCGGAATTACTGGGTGTAAAGGGAGCGTAGGCGGGATGGCAAGTCA  
GATGTGAAAATCTATGGGCTCAACCCATAGACTGCATTTGAAACTGTTGTTCTTGAGTGAGGTAGAGGT  
AAGCGGAATTCCTGGTGTAGCGGTGAAATGCGTAGAGATCAGGAGGAACATCGGTGGCGAAGGCGGC  
TTACTGGGCCTTTACTGACGCTGAGGCTCGAAAGCGTGGGGAGCAAAC

> Oligotype TGAGCGAAAGTTTCGAACTTACGGC

TACGTAGGGAGCGAGCGTTGTCCGGAATTACTGGGTGTAAAGGGAGCGTAGGCGGGACGGCAAGTCA  
GATGTGAAAATCTATGGGCTCAACCCATAGACTGCATTTGAAACTGTTGTTCTTGAGTGAGGTAGAGGT  
AAGCGGAATTCCTGGTGTAGCGGTGAAATGCGTAGAGATCAGGAGGAACATCGGTGGCGAAGGCGGC  
TTACTGGGCCTTTACTGACGCTGAGGCTCGAAAGCGTGGGGAGCAAAC

> Oligotype TGAAAAAAGATTTTCGAACTAACGTC

TACATAGGGAGCAAGCGTTATCCGATTTACTGGGTGTAAAGGGTGCCTAGGCGGCTAAGCAAGTCA  
GATGTGAAATACACGGGCTCAACCCGTGAGCTGCATTTGAAACTGTTTAGCTTGAGTGAAGTAGAGGC  
AGGCGGAATTCCTGGTGTAGCGGTGAAATGCGTAGAGATCGGGAGGAACACCAGTGCGCAAGGCGGC  
CTGCTGGGCTTTAACTGACGCTGAGGCACGAAAGCGTGGGTAGCAAAC

> Oligotype TTGGAGAAAATTTTGAACCTTACGGC

TACGTAGGTGGCGAGCGTTGTCCGGAATTACTGGGTGTAAAGGGAGTGTAGGCGGGAAGGCAAGTCA  
GAAGTGAAAATTATGGGCTTAACCCATAACCTGCTTTTGAAACTGTTTTCTTGAGTGAGGCAGAGGC  
AAGCGGAATTCCTAGTGTAGCGGTGAAATGCGTAGATATTAGGAGGAACACCAGTGCGCAAGGCGGC  
TTGCTGGGCTTTACTGACGCTGAGGCTCGAAAGCGTGGGGAGCAAAC

> Oligotype TGAGTGAAAGTCTCGAACTTACGGC

TACGTAGGGAGCGAGCGTTGTCCGGAATTACTGGGTGTAAAGGGAGCGTAGGCGGGATGGCAAGTCA  
GATGTGAAAATCTATGGGCTCAACCCATAGACTGCATTTGAAACTGCTGTTCTTGAGTGAGGTAGAGGT  
AAGCGGAATTCCTGGTGTAGCGGTGAAATGCGTAGAGATCAGGAGGAACATCGGTGGCGAAGGCGGC  
TTACTGGGCCTTTACTGACGCTGAGGCTCGAAAGCGTGGGGAGCAAAC

> Oligotype TGAATTTAAATTTGGAACCTAACGTA

TACGTAGGGAGCAAGCGTTGTCCGATTTACTGGGTGTAAAGGGTGCCTAGGCGGCTTTGCAAGTCAG  
ATGTGAAATCTATGGGCTCAACCCATAAACTGCATTTGAAACTGTAGAGCTTGAGTGAAGTAGAGGCA  
GGCGGAATTCCTCGTGTAGCGGTGAAATGCGTAGAGATGGGGAGGAACACCAGTGCGCAAGGCGGCC  
TGCTGGGCTTTAACTGACGCTGAGGCACGAAAGCGTGGGTAGCAAAA

> Oligotype TGAATTTAAATTTGGAACCTAACGGC

TACGTAGGGAGCAAGCGTTGTCCGATTTACTGGGTGTAAAGGGTGCCTAGGCGGCTTTGCAAGTCAG  
ATGTGAAATCTATGGGCTCAACCCATAAACTGCATTTGAAACTGTAGAGCTTGAGTGAAGTAGAGGCA  
GGCGGAATTCCTCGTGTAGCGGTGAAATGCGTAGAGATGGGGAGGAACACCAGTGCGCAAGGCGGCC  
TGCTGGGCTTTAACTGACGCTGAGGCACGAAAGCGTGGGGAGCAAAC

PhyloSeq, *Ruminococceae Ruminococcus* sp. enriched in HIV-negative vs. CD4 <200

>Oligotype TACTCTGAACTAAACGTTT

TACGTAGGGAGCAAGCGTTGTCCGATTTACTGGGTGTAAAGGGTGCCTAGGCGGCTTTGCAAGTCAG  
ATGTGAAATCTATGGGCTCAACCCATAAACTGCATTTGAAACTGTAGAGCTTGAGTGAAGTAGAGGCA

GGCGGAATCCCCGTGTAGCGGTGAAATGCGTAGAGATGGGGAGGAACACCAGTGGCGAAGGCCGCC  
TGCTGGGCTTTAACTGACGCTGAGGCACGAAAGCGTGGGTAGCAAAC

>Oligotype TAATGTCAACTAAACGTTT

TACATAGGGAGCAAGCGTTATCCGGATTTACTGGGTGTAAAGGGTGCCTAGGCCGGCTAAGCAAGTCA  
GATGTGAAATACACGGGCTCAACCCGTGAGCTGCATTTGAAACTGTTTAGCTTGAGTGAAGTAGAGGC  
AGGCGGAATCCCCGTGTAGCGGTGAAATGCGTAGAGATCGGGAGGAACACCAGTGGCGAAGGCCGCC  
CTGCTGGGCTTTAACTGACGCTGAGGCACGAAAGCGTGGGTAGCAAAC

>Oligotype TACTCTGAACTAAACGTTA

TACGTAGGGAGCAAGCGTTGTCCGGATTTACTGGGTGTAAAGGGTGCCTAGGCCGGCTTTGCAAGTCAG  
ATGTGAAATCTATGGGCTCAACCCATAAACTGCATTTGAAACTGTAGAGCTTGAGTGAAGTAGAGGCA  
GGCGGAATCCCCGTGTAGCGGTGAAATGCGTAGAGATGGGGAGGAACACCAGTGGCGAAGGCCGCC  
TGCTGGGCTTTAACTGACGCTGAGGCACGAAAGCGTGGGTAGCAAAA

>Oligotype TACTCTGAACTAAACGTGC

TACGTAGGGAGCAAGCGTTGTCCGGATTTACTGGGTGTAAAGGGTGCCTAGGCCGGCTTTGCAAGTCAG  
ATGTGAAATCTATGGGCTCAACCCATAAACTGCATTTGAAACTGTAGAGCTTGAGTGAAGTAGAGGCA  
GGCGGAATCCCCGTGTAGCGGTGAAATGCGTAGAGATGGGGAGGAACACCAGTGGCGAAGGCCGCC  
TGCTGGGCTTTAACTGACGCTGAGGCACGAAAGCGTGGGGAGCAAAC

>Oligotype TATGATTAATCAAACATGC

TACGTAGGGAGCGAGCGTTGTCCGGAATTATTGGGTGTAAAGGGTGCCTAGGCCGGCTATGTAAGTCAG  
GCGTGTAAATTCAGAGGCTTAACCTCTTGACGGCGCTTGAAACTGTGTAGCTTGAGTGGAGTAGAGGCA  
GATGGAATTTCCAGTGTAGCGGTGAAATGCGTAGATATTGGAAGGAACATCGGTGGCGAAGGCCGATC  
TGCTGGGCTCTAACTGACGCTGAGGCACGAAAGCATGGGGAGCAAAC

>Oligotype TACTCTGAATTAACGTTT

TACGTAGGGAGCAAGCGTTGTCCGGATTTACTGGGTGTAAAGGGTGCCTAGGCCGGCTTTGCAAGTCAG  
ATGTGAAATCTATGGGCTCAACCCATAAACTGCATTTGAAACTGTAGAGCTTGAGTGAAGTAGAGGCA  
GGCGGAATCCCCGTGTAGCGGTGAAATGCGTAGAGATGGGGAGGAACACCAGTGGCGAAGGCCGGT  
TGCTGGGCTTTAACTGACGCTGAGGCACGAAAGCGTGGGTAGCAAAC

>Oligotype TATTATTAATTAACATGC

TACGTAGGGAGCGAGCGTTGTCCGGAATTATTGGGTGTAAAGGGTGCCTAGGCCGGCTATGTAAGTCAG  
GCGTGTAAATTCAGAGGCTTAACCTCTTGACTGCGCTTGAAACTGTGTAGCTTGAGTGGAGTAGAGGCA  
GATGGAATTTCCAGTGTAGCGGTGAAATGCGTAGATATTGGAAGGAACATCGGTGGCGAAGGCCGATC  
TGCTGGGCTTTAACTGACGCTGAGGCACGAAAGCATGGGGAGCAAAC

MaAsLin, *Enterobacteriaceae* enriched in CD4 <200

>Oligotype TTTCTTTTGTATGAC

TACGGAGGGTGCAAGCGTTAATCGGAATTACTGGGCGTAAAGCGCACGCAGGCCGGTTTGTAAAGTCAG  
ATGTGAAATCCCCGGGCTCAACCTGGGAACTGCATCTGATACTGGCAAGCTTGAGTCTCGTAGAGGGG  
GGTAGAATTCCAGGTGTAGCGGTGAAATGCGTAGAGATCTGGAGGAATACCGGTGGCGAAGGCCGCC  
CCCTGGACGAAGACTGACGCTCAGGTGCGAAAGCGTGGGGAGCAAAC

>Oligotype TTTCTTTTGTATGAA

TACGGAGGGTGCAAGCGTTAATCGGAATTACTGGGCGTAAAGCGCACGCAGGCCGGTTTGTAAAGTCAG  
ATGTGAAATCCCCGGGCTCAACCTGGGAACTGCATCTGATACTGGCAAGCTTGAGTCTCGTAGAGGGG  
GGTAGAATTCCAGGTGTAGCGGTGAAATGCGTAGAGATCTGGAGGAATACCGGTGGCGAAGGCCGCC  
CCCTGGACGAAGACTGACGCTCAGGTGCGAAAGCGTGGGGAGCAAAA

>Oligotype CTTCTTTTGTATGAC

CACGGAGGGTGCAAGCGTTAATCGGAATTACTGGGCGTAAAGCGCACGCAGGCCGGTTTGTAAAGTCA  
GATGTGAAATCCCCGGGCTCAACCTGGGAACTGCATCTGATACTGGCAAGCTTGAGTCTCGTAGAGGG

GGGTAGAATTCAGGTGTAGCGGTGAAATGCGTAGAGATCTGGAGGAATACCGGTGGCGAAGGCCGGC  
CCCCGGACGAAGACTGACGCTCAGGTGCGAAAGCGTGGGGAGCAAAC

>Oligotype TTGTTTTTGTATGAC

TACGGAGGGTGAAGCGTTAATCGGAATTAATCGGAACTACTGGGCGTAAAGCGCACGCAGGCGGTTGATTAAGTCA  
GATGTGAAATCCCCGGGCTCAACCTGGGAACTGCATCTGATACTGGTCAGCTTGAGTCTCGTAGAGGG  
GGGTAGAATTCAGGTGTAGCGGTGAAATGCGTAGAGATCTGGAGGAATACCGGTGGCGAAGGCCGGC  
CCCCGGACGAAGACTGACGCTCAGGTGCGAAAGCGTGGGGAGCAAAC

### Statistical Analysis

Descriptive measures were used to summarize the data. Continuous variables were summarized using median and IQR; categorical variables were summarized using frequency and percent (%). Spearman's rank correlations were used to examine bivariate associations between study variables. Fisher's exact and Chi-square tests were used to compare categorical variables between the study groups. Mann-Whitney test and Kruskal Wallis test (indicated by *p*-value in text) with Dunn's post hoc analyses (*p*-values in figures) were used for comparing continuous variables. PhyloSeq (v1.10.0) (McMurdie and Holmes, 2012) was used to calculate UniFrac distances between 16S samples and to perform principal coordinate analysis. MaAsLin (<http://huttenhower.sph.harvard.edu/maaslin>) was used for multivariate modeling by importing the relative abundance values and associated sample metadata. Minimum for feature relative abundance filtering was set to 1e-6, maximum false discovery rate at 0.05, minimum for feature prevalence filtering set to 0.1, and Benjamini-Hochberg FDR (BH-FDR) protocol was used for multiple comparison correction. Statistical significance of distance and dissimilarity metrics (beta-diversity) between groups was determined by PERMANOVA using the *adonis* function of QIIME. Differential abundance of bacterial taxa between experimental groups was determined using the PhyloSeq DESeq2 extension using the Wald significance test and a parametric fit type (v.1.6.3) (Anders and Huber, 2010; McMurdie and Holmes, 2012) with multiple comparison correction using BH-FDR. No correction for multiple comparisons was performed unless otherwise stated. Statistical analyses and graphing were performed in R (Team, 2013) and Prism version 6.05 for Windows (GraphPad Software, La Jolla California USA, [www.graphpad.com](http://www.graphpad.com)). All *p*-values were two-sided and *p* < 0.05 was considered significant.

### SUPPLEMENTAL REFERENCES

- Anders, S., and Huber, W. (2010). Differential expression analysis for sequence count data. *Genome Biol* 11, R106.
- Bankevich, A., Nurk, S., Antipov, D., Gurevich, A.A., Dvorkin, M., Kulikov, A.S., Lesin, V.M., Nikolenko, S.I., Pham, S., Prjibelski, A.D., *et al.* (2012). SPAdes: a new genome assembly algorithm and its applications to single-cell sequencing. *Journal of computational biology : a journal of computational molecular cell biology* 19, 455-477.
- Caporaso, J.G., Kuczynski, J., Stombaugh, J., Bittinger, K., Bushman, F.D., Costello, E.K., Fierer, N., Peña, A.G., Goodrich, J.K., Gordon, J.I., *et al.* (2010). QIIME allows analysis of high-throughput community sequencing data. *Nature methods* 7, 335-336.
- Caporaso, J.G., Lauber, C.L., Walters, W.A., Berg-Lyons, D., Lozupone, C.A., Turnbaugh, P.J., Fierer, N., and Knight, R. (2011). Global patterns of 16S rRNA diversity at a depth of millions of sequences per sample. *Proceedings of the National Academy of Sciences of the United States of America* 108, 4516-4522.
- Edgar, R.C. (2004). MUSCLE: multiple sequence alignment with high accuracy and high throughput. *Nucleic Acids Res* 32, 1792-1797.
- Edgar, R.C. (2010). Search and clustering orders of magnitude faster than BLAST. *Bioinformatics* 26, 2460-2461.
- Eren, A.M., Zozaya, M., Taylor, C.M., Dowd, S.E., Martin, D.H., and Ferris, M.J. (2011). Exploring the diversity of *Gardnerella vaginalis* in the genitourinary tract microbiota of monogamous couples through subtle nucleotide variation. *PloS one* 6, e26732.
- Faith, D.P., and Baker, A.M. (2006). Phylogenetic diversity (PD) and biodiversity conservation: some bioinformatics challenges. *Evolutionary Bioinformatics Online* 2, 121-128.
- Fu, L., Niu, B., Zhu, Z., Wu, S., and Li, W. (2012). CD-HIT: accelerated for clustering the next-generation sequencing data. *Bioinformatics* 28, 3150-3152.
- Guindon, S., and Gascuel, O. (2003). A simple, fast, and accurate algorithm to estimate large phylogenies by maximum likelihood. *SystBiol* 52, 696-704.
- Huson, D.H., Mitra, S., Ruscheweyh, H.-J., Weber, N., and Schuster, S.C. (2011). Integrative analysis of environmental sequences using MEGAN4. *Genome research* 21, 1552-1560.

Kindt, R.C., R. (2005). Tree diversity analysis. A manual and software for common statistical methods for ecological and biodiversity studies. (Nairobi, World Agroforestry Centre (ICRAF)).

Li, W., and Godzik, A. (2006). Cd-hit: a fast program for clustering and comparing large sets of protein or nucleotide sequences. *Bioinformatics* 22, 1658-1659.

Maggi, F., Pifferi, M., Tempestini, E., Fornai, C., Lanini, L., Andreoli, E., Vatteroni, M., Presciuttini, S., Pietrobelli, A., Boner, A., *et al.* (2003). TT virus loads and lymphocyte subpopulations in children with acute respiratory diseases. *Journal of virology* 77, 9081-9083.

McDonald, D., Price, M.N., Goodrich, J., Nawrocki, E.P., DeSantis, T.Z., Probst, A., Andersen, G.L., Knight, R., and Hugenholtz, P. (2012). An improved Greengenes taxonomy with explicit ranks for ecological and evolutionary analyses of bacteria and archaea. *The ISME journal* 6, 610-618.

McMurdie, P.J., and Holmes, S. (2012). Phyloseq: a bioconductor package for handling and analysis of high-throughput phylogenetic sequence data. *Pac Symp Biocomput*, 235-246.

Oksanen, J., Blanchet, F.G., Kindt, R., Legendre, P., Minchin, P.R., O'Hara, R.B., Simpson, G.L., Solymos, P., Henry, M., Stevens, H., *et al.* (2013). *vegan: Community Ecology Package*. R package version 2.0-10.

Reyes, A., Haynes, M., Hanson, N., Angly, F.E., Heath, A.C., Rohwer, F., and Gordon, J.I. (2010). Viruses in the faecal microbiota of monozygotic twins and their mothers. *Nature* 466, 334-338.

Reyes, A., Wu, M., McNulty, N.P., Rohwer, F.L., and Gordon, J.I. (2013). Gnotobiotic mouse model of phage-bacterial host dynamics in the human gut. *Proceedings of the National Academy of Sciences of the United States of America* 110, 20236-20241.

Team, R.C. (2013). R: A language and environment for statistical computing (Vienna, Austria, R Foundation for Statistical Computing).

Thurber, R.V., Haynes, M., Breitbart, M., Wegley, L., and Rohwer, F. (2009). Laboratory procedures to generate viral metagenomes. *Nature protocols* 4, 470-483.

Walton, A.H., Muenzer, J.T., Rasche, D., Boomer, J.S., Sato, B., Brownstein, B.H., Pachot, A., Brooks, T.L., Deych, E., Shannon, W.D., *et al.* (2014). Reactivation of multiple viruses in patients with sepsis. *PLoS one* 9, e98819.

Warnes, G.R., Bolker, B., Bonebakker, L., Gentleman, R., Huber, W., Liaw, A., Lumley, T., Maechler, M., Magnusson, A., Moeller, S., *et al.* (2015). *gplots: Various R Programming Tools for Plotting Data*. R package version 2.17.0.
